# Supplementary material
Source: MDPI journal article supplement (https://www.mdpi.com/2071-1050/13/12/6522)
Supplement: s1 [file s1]

# Supplement

**Table S1.** Model weights assigned to each climate model to calculate the mean, low and high variant for RCP 4.5 and RCP 8.5 (for model references c.f. Table 1, main article).

| Climate models |      |             | RCP 4.5            |         |        |        | RCP 8.5            |         |        |        |
|----------------|------|-------------|--------------------|---------|--------|--------|--------------------|---------|--------|--------|
| GCM            | RCM  | Realization | $\Delta T_{jja}^1$ | variant |        |        | $\Delta T_{jja}^1$ | variant |        |        |
|                |      |             |                    | mean    | low    | high   |                    | mean    | low    | high   |
| CNRM           | CCLM | r1          | 1.22               | 0.1     | 0.2521 | 0.0005 | 2.70               | 0.1     | 0.1697 | 0.0041 |
| CNRM           | RCA4 | r1          | 0.85               | 0.1     | 0.3573 | 0.0000 | 2.70               | 0.1     | 0.2521 | 0.0005 |
| EC-Earth       | CCLM | r12         | 1.68               | 0.1     | 0.1075 | 0.0138 | 3.88               | 0.1     | 0.0323 | 0.0626 |
| EC-Earth       | RCA4 | r12         | 2.64               | 0.1     | 0.0005 | 0.2521 | 4.89               | 0.1     | 0.0005 | 0.2521 |
| HadGEM2-ES     | CCLM | r1          | 2.87               | 0.1     | 0.0000 | 0.3573 | 5.94               | 0.1     | 0.0000 | 0.3573 |
| HadGEM2-ES     | RCA4 | r1          | 1.82               | 0.1     | 0.0323 | 0.0626 | 4.49               | 0.1     | 0.0041 | 0.1697 |
| MPI-ESM-LR     | CCLM | r1          | 1.77               | 0.1     | 0.0626 | 0.0323 | 3.31               | 0.1     | 0.1075 | 0.0138 |
| MPI-ESM-LR     | RCA4 | r1          | 2.45               | 0.1     | 0.0041 | 0.1697 | 3.90               | 0.1     | 0.0138 | 0.1075 |
| MPI-ESM-LR     | REMO | r1          | 1.85               | 0.1     | 0.0138 | 0.1075 | 2.53               | 0.1     | 0.3573 | 0.0000 |
| MPI-ESM-LR     | REMO | r2          | 1.31               | 0.1     | 0.1697 | 0.0041 | 3.43               | 0.1     | 0.0626 | 0.0323 |

<sup>1</sup>  $\Delta T_{jja}$  = difference in summer temperature between 2000 and 2100 (c.f. Table 2, main article).

## Supplement

**Table S2.** NFI-plots = 1 km<sup>2</sup> grid cells with one or more NFI-(sub)plots [59]; forest area from *State of Europe's forests 2015*; plot representation area = average forest area per NFI plot.

| Country        | NFI plots | species occurrences | mean species occurrence/ NFI plot | forest area 2015 (km <sup>2</sup> ) | plot representation area (km <sup>2</sup> ) |
|----------------|-----------|---------------------|-----------------------------------|-------------------------------------|---------------------------------------------|
| Austria        | 3357      | 10213               | 3,0                               | 38690                               | 11,5                                        |
| Czech Rep      | 10314     | 30910               | 3,0                               | 26670                               | 2,6                                         |
| Denmark        | 2479      | 7215                | 2,9                               | 6120                                | 2,5                                         |
| Estonia        | 2882      | 7962                | 2,8                               | 22320                               | 7,7                                         |
| Finland        | 23327     | 61864               | 2,7                               | 222180                              | 9,5                                         |
| France         | 31320     | 77893               | 2,5                               | 169890                              | 5,4                                         |
| Germany        | 18278     | 64694               | 3,5                               | 114190                              | 6,2                                         |
| Hungary        | 4365      | 15171               | 3,5                               | 20690                               | 4,7                                         |
| Ireland        | 1413      | 2561                | 1,8                               | 7540                                | 5,3                                         |
| Italy          | 6434      | 18955               | 2,9                               | 92970                               | 14,4                                        |
| Latvia         | 3894      | 4793                | 1,2                               | 33560                               | 8,6                                         |
| Lithuania      | 1970      | 6948                | 3,5                               | 21800                               | 11,1                                        |
| Netherlands    | 2664      | 5689                | 2,1                               | 3760                                | 1,4                                         |
| Norway         | 10785     | 24567               | 2,3                               | 121120                              | 11,2                                        |
| Portugal       | 4532      | 6049                | 1,3                               | 31820                               | 7,0                                         |
| Romania        | 3048      | 13160               | 4,3                               | 68610                               | 22,5                                        |
| Slovakia       | 1290      | 3503                | 2,7                               | 19400                               | 15,0                                        |
| Spain          | 72596     | 116204              | 1,6                               | 184180                              | 2,5                                         |
| Sweden         | 9968      | 22255               | 2,2                               | 280730                              | 28,2                                        |
| Switzerland    | 5491      | 13037               | 2,4                               | 12540                               | 2,3                                         |
| United Kingdom | 19399     | 42596               | 2,2                               | 31440                               | 1,6                                         |

## Supplement

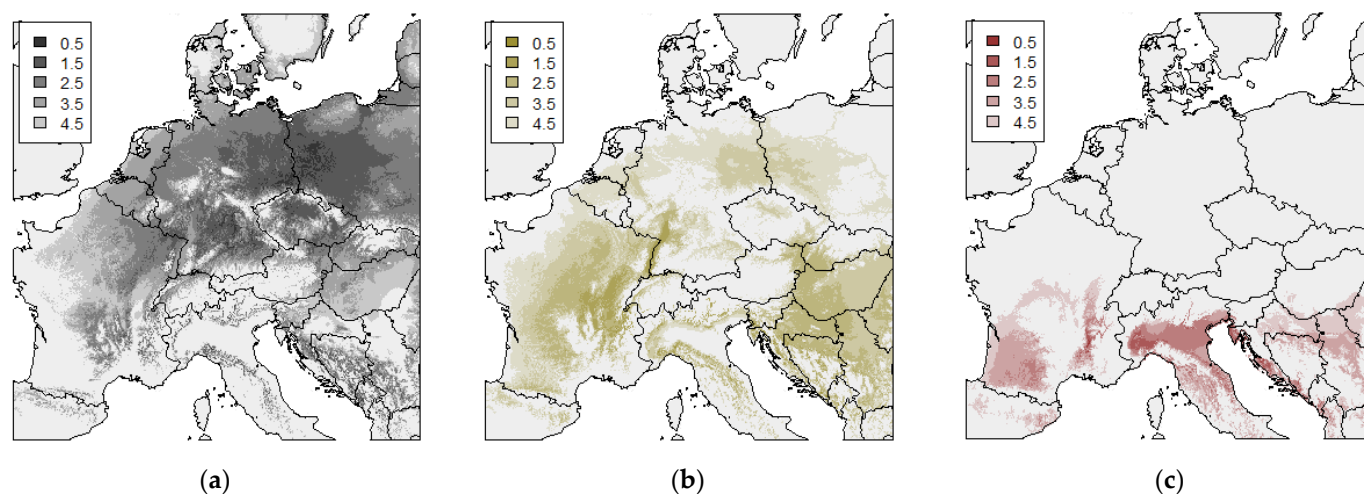

**Figure S1.** Climate distance maps of Europe for Roth RCP 8.5 mean variant: (a) 2000, (b) 2060, (c) 2100.

The climate distance maps in Figure S1 complement Figure 3 (b) (main article) by visualizing different thresholds of climatic distances for three selected 20-year time steps of the RCP 8.5 mean variant: 2000, 2060 and 2100. Five threshold distances are displayed through different color tones: from 0.5 (close analogue, dark color tones) to 4.5 (distant analogue, light color tones). For the definition of the climatic distance see Equation (1). The climate distance map for 2000 in Figure S1 (a) is the only one with regions within a 0.5 threshold distance. Together with the 1.5 threshold distance the regions correspond to the twin regions for 2000 in Figure 3 (b) (main article). Expanding the threshold distance to 2.5 includes areas of northern Germany and central Poland. The Netherlands and Belgium are still within a threshold distance of 3.5. The Hungarian plains are among regions within a threshold distance of 4.5. In the climatic distance maps for 2060 and 2100 in Figure S1 (b) and (c), the closest climatic distances start with a threshold distance of 1.5. The overall shift in the climate distance maps from 2000 to 2060 to 2100 is southwards. The climatic distance map for 2060 in Figure S1 (b) highlights regions in Central France – the Saone-Rhone valley remaining within the 1.5 threshold distance – and West Hungary/ North Croatia where a threshold distance of 2.5 applies. The upper Rhine valley with a threshold distance of 1.5 is the northernmost outlier within such a low threshold. The climate distance map for 2100 in Figure S1 (c) exhibits four regions with climatic distances within the threshold of 2.5: the Gascogne in Southwest France, the Rhone valley in East France, the Po-valley in North Italy and the Mediterranean coast of Croatia. The climatically closest regions are the already mentioned Rhone valley and upper Po valley within a threshold distance of 1.5. Besides the mentioned larger twin regions, mountain regions like the Massif Central, the Apennine or the Dinarian Alps can cover a wide range of analogues in a very small extent due to the orographic alteration of temperature and precipitation. This requires paying high attention towards the altitude when using the climate analogues.

## Supplement

## Roth (RCP 45 low)

'icle'-graphic

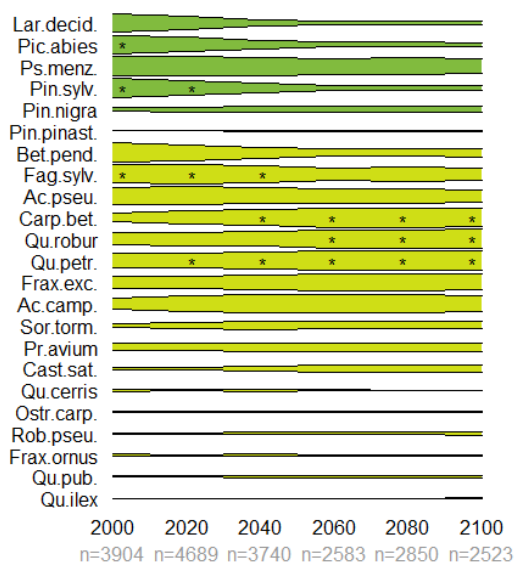

(a)

## Roth (RCP 85 low)

'icle'-graphic

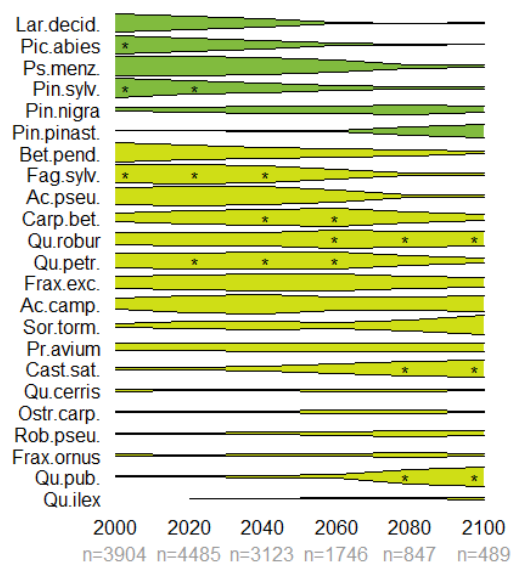

(b)

## Roth (RCP 45 high)

'icle'-graphic

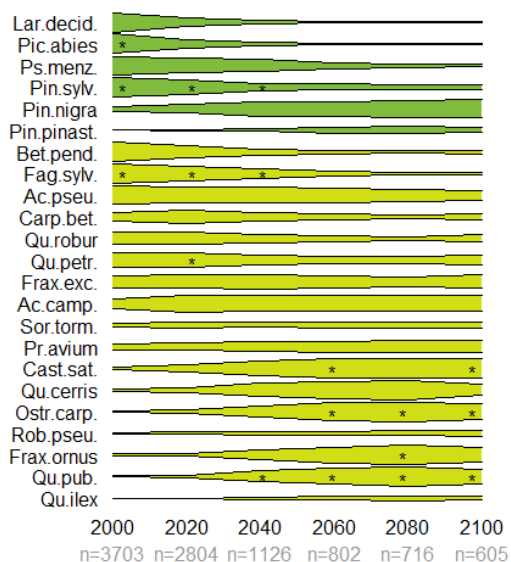

(c)

## Roth (RCP 85 high)

'icle'-graphic

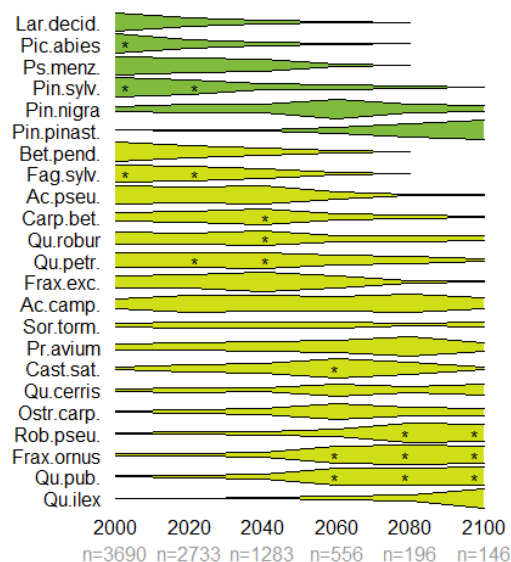

(d)

**Figure S2.** Prevalence trajectory graphics showing relative prevalence from 2000 to 2100 of 23 major tree species in the twin regions of the RCP 4.5 and RCP 8.5 low and high variants for site Roth. Grey numbers below the x-axis indicate the number of NFI-plots in the twin regions of each time step; grey numbers on the right vertical axis the total number of species occurrence in the plots of all twin regions from 2000 to 2100. Asterisks <\*> in the species cones mark the three species with the highest absolute prevalence in each 20-year time step. Species abbreviations as in Table 3 (main article).
